# Supplementary material for: A novel method for rapidly functionalizing perovskite oxides
Source: Royal Society of Chemistry journal article supplement (doi:10.1039/d5nr05033b), 2026-01-01
Supplement: d5nr05033b1.pdf [file d5nr05033b1.pdf]

## **A novel method to rapidly functionalize perovskite oxide**

Weiwei Fan<sup>\*,1</sup>, Zhu Sun<sup>\*,2</sup>, Rui Xiao<sup>1</sup>

<sup>1</sup>Key Laboratory of Energy Thermal Conversion and Control of Ministry of Education, School of Energy and Environment, Southeast University, 2 Dong Nan Da Xue Road, Nanjing, 211189, China

<sup>2</sup>School of Materials Science and Engineering, Shanghai Jiao Tong University, 800 Dongchuan Road, Shanghai, 200240, China

\*Corresponding author email: [fanww@seu.edu.cn](mailto:fanww@seu.edu.cn)

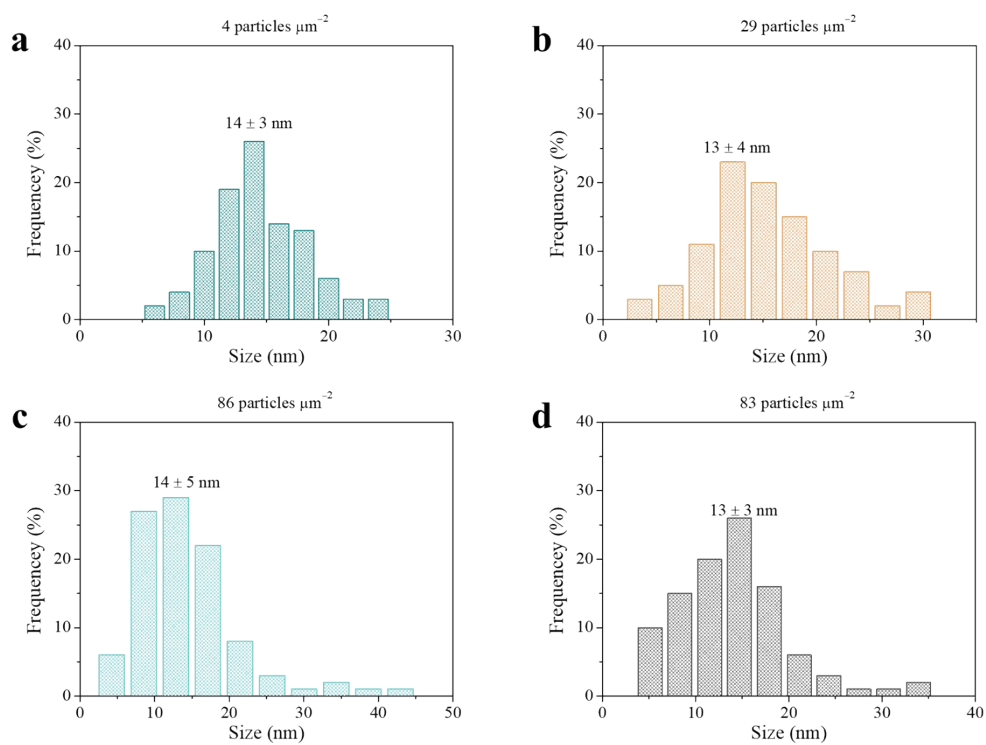

**Figure S1** Particle size distribution of (a) PN3, (b) PN6, (c) PN9 and (d) PN12 after P-V shock.

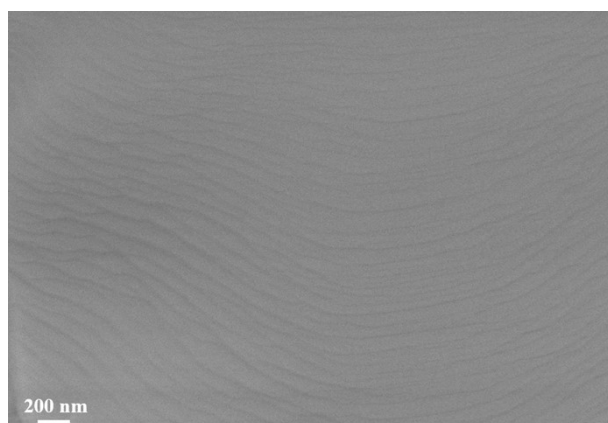

**Figure S2** SEM image of the LCTN treated by voltage shock.

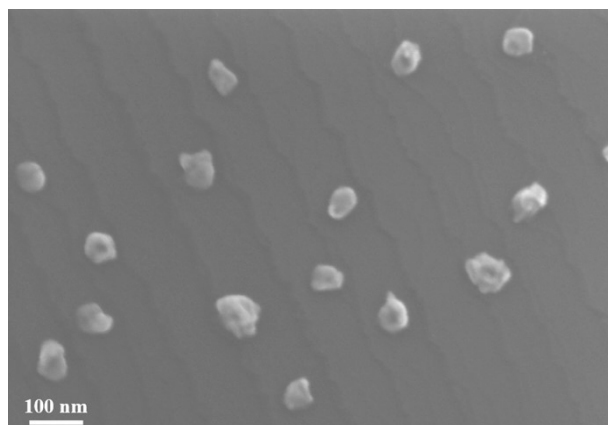

**Figure S3** SEM image of LCTN treated in H<sub>2</sub> at 900°C for 20h.

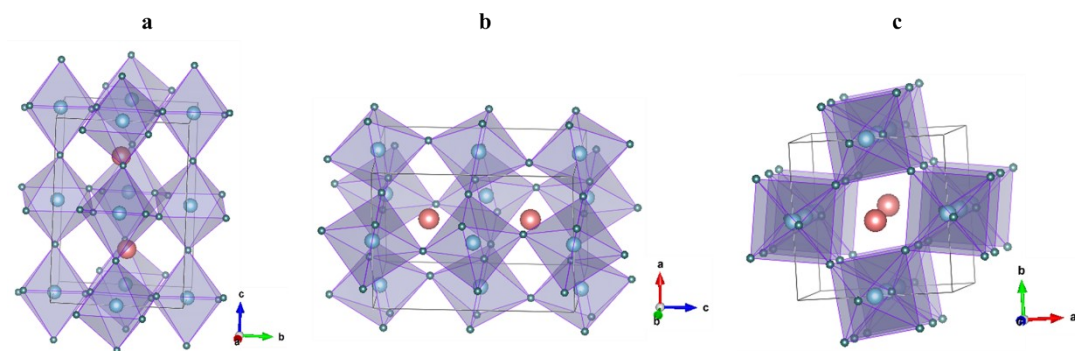

**Figure S4 a-c**, Views of orthorhombic structure of LCFN perovskite. Pink spheres denote La/Ca, blue spheres denote Ti/Ni, and green spheres denote O, respectively.

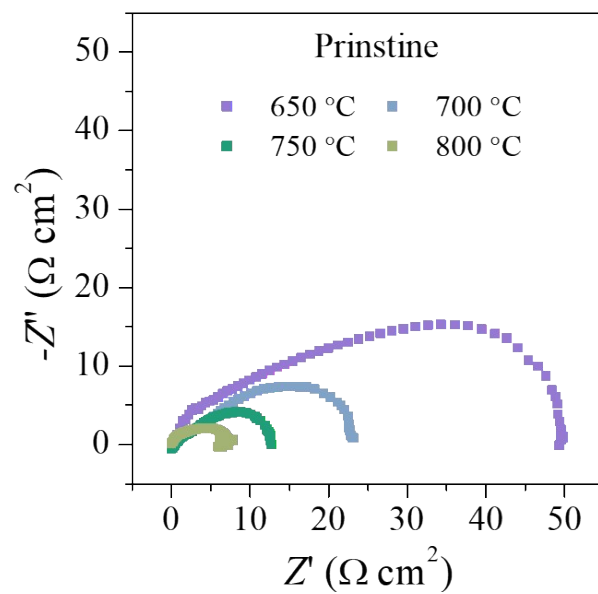

**Figure S5** Nyquist plots of the pristine LCTN under OCV.

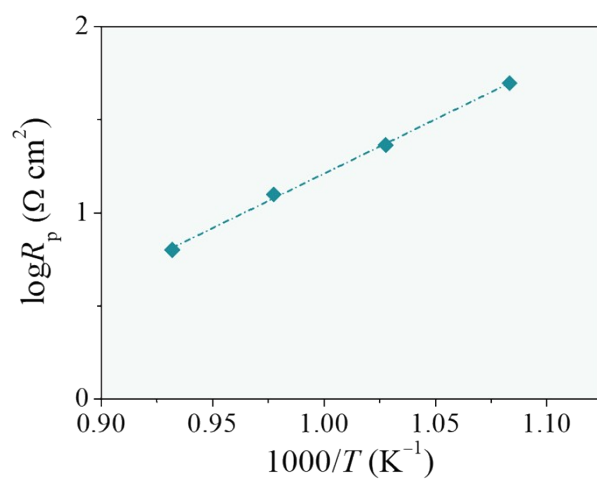

**Figure S6** Arrhenius plot of  $R_p$  of the pristine LCTN.

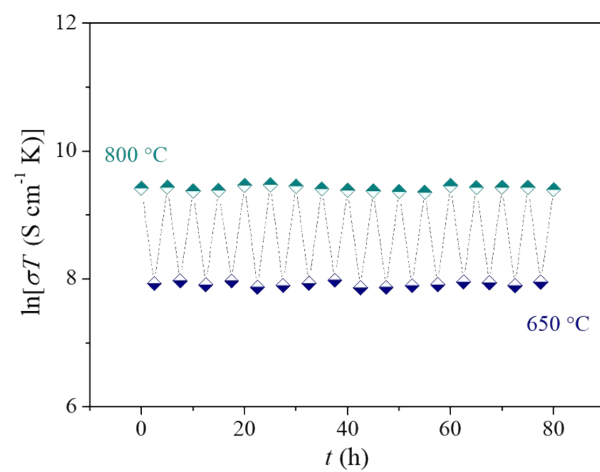

**Figure S7** Thermal cycling stability of LCTN-PN9 in hydrogen.



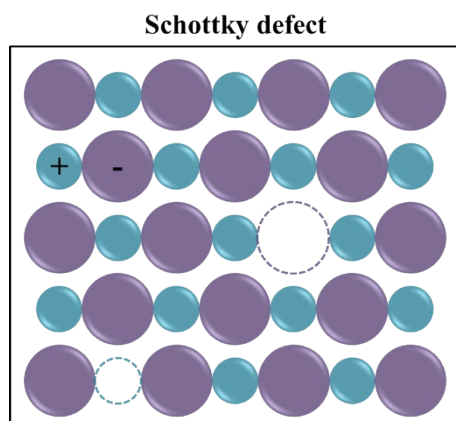

**Figure S8** Illustration of Schottky defect in perovskite solid.

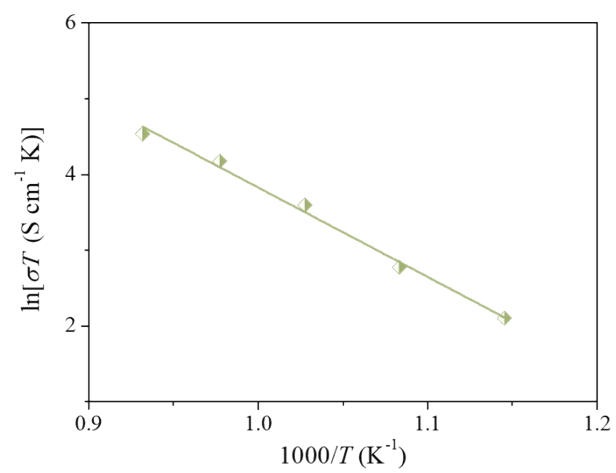

**Figure S9** Electrical conductivity of pristine LCTN at different temperatures in hydrogen.

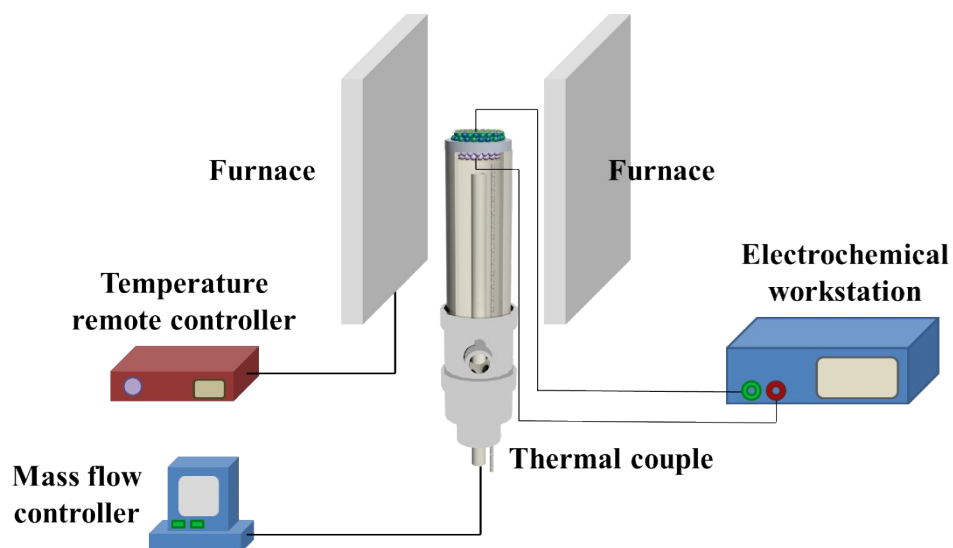

**Figure S10** Schematic of the home-made setup used for the cell performance tests.

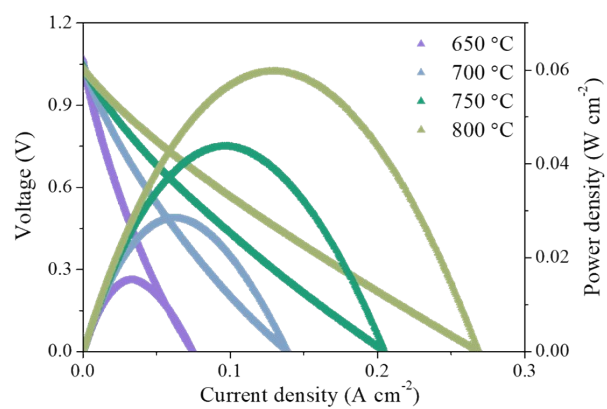

**Figure S11**  $I$ - $V(P)$  curves of the pristine LCTN collected at different temperatures.

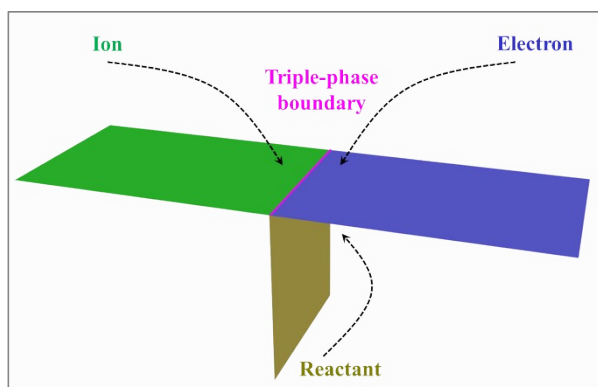

**Figure S12** Schematic illustration of the triple-phase boundary.

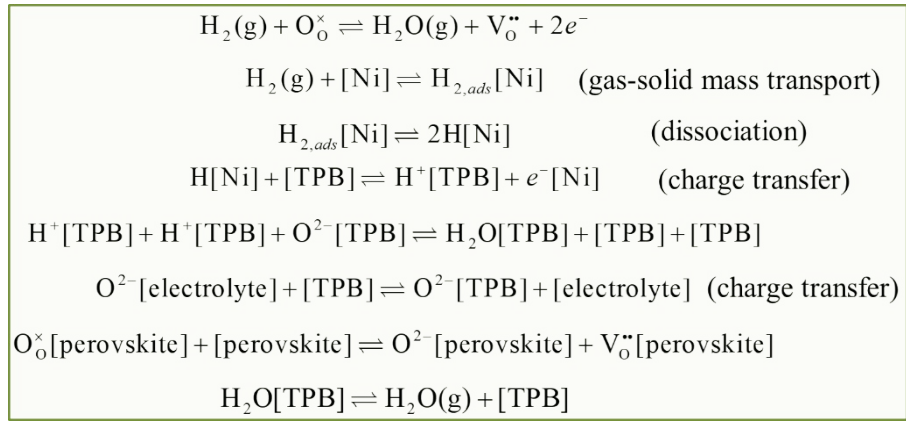

**Figure S13** Procedures for the electrochemical oxidation of hydrogen under the assistance of exsolved nickel nanoparticles. Note: in the expressions,  $\text{H}[\text{Ni}]$  represents the atomic hydrogen adsorbed on Ni,  $[\text{Ni}]$  represents a vacant site on the surface of Ni,  $e^-$  represents an electron in Ni and  $\text{O}_\text{o}^\times$  represents lattice oxygen, respectively.

## Note 1:

### Exsolution depth

Assuming the exsolved particle is a sphere, then the volume of a particle can be calculated by

$$V = \frac{4}{3}\pi\left(\frac{D}{2}\right)^3$$

where  $D$  is the diameter of particle. In a particle, the number of metal atoms is evaluated by

$$N = \frac{\rho V}{A_M \times 1.661 \times 10^{-27}}$$

where  $\rho$  represents the mass density of metal ( $\rho_{\text{Ni}} = 8900 \text{ kg m}^{-3}$ ),  $A_M$  represents the atomic mass of metal ( $A_{\text{Ni}} = 58.69$ ). Then, the number of metal atoms (Ni) exsolved from per surface area ( $N_{\text{SA}}$ ) can be acquired as follows

$$N_{\text{SA}} = N \times P_D$$

where  $P_D$  is the particle density obtained experimentally. Then, the number of exsolvable metal atoms per surface area and per depth in nanometer ( $N_V$ ) can be calculated from

$$N_V = \frac{0.06}{0.54623 \times 0.77317 \times 0.54623} = 0.26 \text{ nm}^{-3}$$

where 0.06 is the atomic ratio of Ni in a unit cell, and  $0.54723 \text{ nm} \times 0.77275 \text{ nm} \times 0.54698 \text{ nm}$  is the unit cell parameters obtained from the Rietveld refinement of XRD. Then, the depth ( $D_{\text{ep}}$ ) can be evaluated from

$$D_{\text{ep}} = \frac{N_{\text{SA}}}{N_V}$$

**Table S1** Chemical composition of the as-prepared LCTN measured by ICP-AES.

| Sample                                                                       | La:Ca:Ti:Ni atomic ratio |                         |
|------------------------------------------------------------------------------|--------------------------|-------------------------|
|                                                                              | Designed                 | ICP                     |
| $\text{La}_{0.32}\text{Ca}_{0.48}\text{Ti}_{0.94}\text{Ni}_{0.06}\text{O}_3$ | 0.32:0.48:0.94:0.06      | 0.323:0.482:0.938:0.058 |



**Table S2** Refined structural parameters of LCTN obtained by fitting of the powder XRD data at room temperature.

| Atoms, sites | Parameters            | LCTFN      |
|--------------|-----------------------|------------|
|              | Space group           | Pbnm (62)  |
|              | $a$ (Å)               | 5.4723 (3) |
|              | $b$ (Å)               | 7.7275 (2) |
|              | $c$ (Å)               | 5.4698 (3) |
|              | $V$ (Å <sup>3</sup> ) | 231.3      |
|              | $x$                   | 0.4670     |
|              | $y$                   | 0.2500     |
| La, 4c       | $z$                   | 0.0072     |
|              | Occupancy             | 0.32       |
|              | $x$                   | 0.4670     |
|              | $y$                   | 0.2500     |
| Ca, 4c       | $z$                   | 0.0072     |
|              | Occupancy             | 0.48       |
|              | $x$                   | 0          |
|              | $y$                   | 0          |
| Ti, 4a       | $z$                   | 0          |
|              | Occupancy             | 0.94       |
|              | $x$                   | 0          |
|              | $y$                   | 0          |
| Ni, 4a       | $z$                   | 0          |
|              | Occupancy             | 0.06       |
|              | $x$                   | 0.5107     |
|              | $y$                   | 0.2500     |
| O1, 4c       | $z$                   | 0.5722     |
|              | Occupancy             | 1          |
|              | $x$                   | 0.2158     |
|              | $y$                   | 0.0346     |
| O1, 8d       | $z$                   | 0.2826     |
|              | Occupancy             | 1          |
|              | $R_{wp}$              | 11.31      |
|              | $R_p$                 | 8.10       |
|              | $\chi^2$              | 6.23       |

**Table S3** Thermodynamic parameters of reducing the corresponding oxide to metal at 800 °C

| Metal oxides                   | $\Delta H$ (kJ mol <sup>-1</sup> ) | $\Delta S$ (J K <sup>-1</sup> mol <sup>-1</sup> ) | $\Delta G$ (kJ mol <sup>-1</sup> ) | Equilibrium constant $K$ |
|--------------------------------|------------------------------------|---------------------------------------------------|------------------------------------|--------------------------|
| La <sub>2</sub> O <sub>3</sub> | 1038.132                           | 106.908                                           | 923.404                            | 1.123E-45                |
| CaO                            | 387.012                            | 49.378                                            | 334.023                            | 5.500E-17                |
| TiO <sub>2</sub>               | 442.309                            | 65.134                                            | 372.410                            | 7.443E-19                |
| NiO                            | -13.012                            | 31.182                                            | -46.474                            | 1.829E+02                |
